# Supplementary material for: The Role of Mean Platelet Volume as a Predictor of Mortality in Critically Ill Patients: A Systematic Review and Meta-Analysis
Source: Hindawi journal article supplement (doi:10.1155/2016/4370834), 2016-01-01
Supplement: f1 [file 4370834.f1.pdf]

# Supplement Appendix

**Appendix A.** Search terms and search strategy used for PubMed, Scopus and Embase

(“mean platelet volume” OR “platelet ind\*” OR “platelet size\*”) AND (sepsis OR “septic shock” OR “intensive care” OR “critically ill\*”)

## Supplemental figures 1–11

**Supplement figure 1.** The pooled mean differences of the mean platelet volume between critically ill non-survivors and survivors: subgroup analysis by “*patient setting (sepsis vs. all ICU)*”.

**Supplement figure 2.** The pooled mean differences of the mean platelet volume between critically ill non-survivors and survivors: subgroup analysis by “*type of study design*”.

**Supplement figure 3.** The pooled mean differences of the mean platelet volume between critically ill non-survivors and survivors: subgroup analysis by “*mortality rate more than 60 percent, 30 – 60 percent and up to 30 percent*”.

**Supplement figure 4.** The pooled mean differences of the mean platelet volume between critically ill non-survivors and survivors: sensitivity analysis by *exclusion the small studies (total sample less than 100)*.

**Supplement figure 5.** The pooled mean differences of the mean platelet volume between critically ill non-survivors and survivors on “*the first day*”.

**Supplement figure 6.** The pooled mean differences of the mean platelet volume between critically ill non-survivors and survivors on “*the second day*”.

**Supplement figure 7.** The pooled mean differences of the mean platelet volume between critically ill non-survivors and survivors on “*the third day*”.

**Supplement figure 8.** The pooled mean differences of the mean platelet volume between critically ill non-survivors and survivors on “*the fourth day*”.

**Supplement figure 9.** The pooled mean differences of the mean platelet volume between critically ill non-survivors and survivors on “*the fifth day*”.

**Supplement figure 10.** The pooled mean differences of the mean platelet volume between critically ill non-survivors and survivors on “*the seventh day*”.

**Supplement figure 11:** The funnel plot of the mean differences in the mean platelet volume between survivors and non-survivors among critically ill patients.

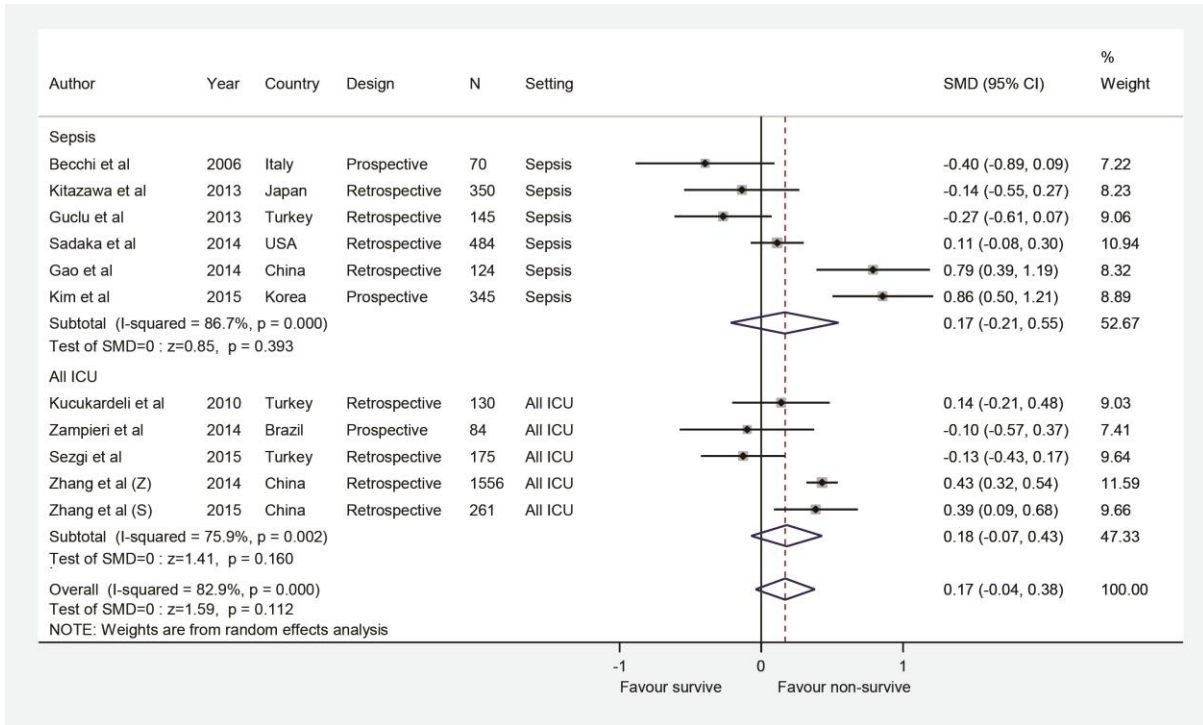

**Supplement figure 1.** The pooled mean differences of the mean platelet volume between critically ill non-survivors and survivors: subgroup analysis by “*patient setting (sepsis vs. all ICU)*”.

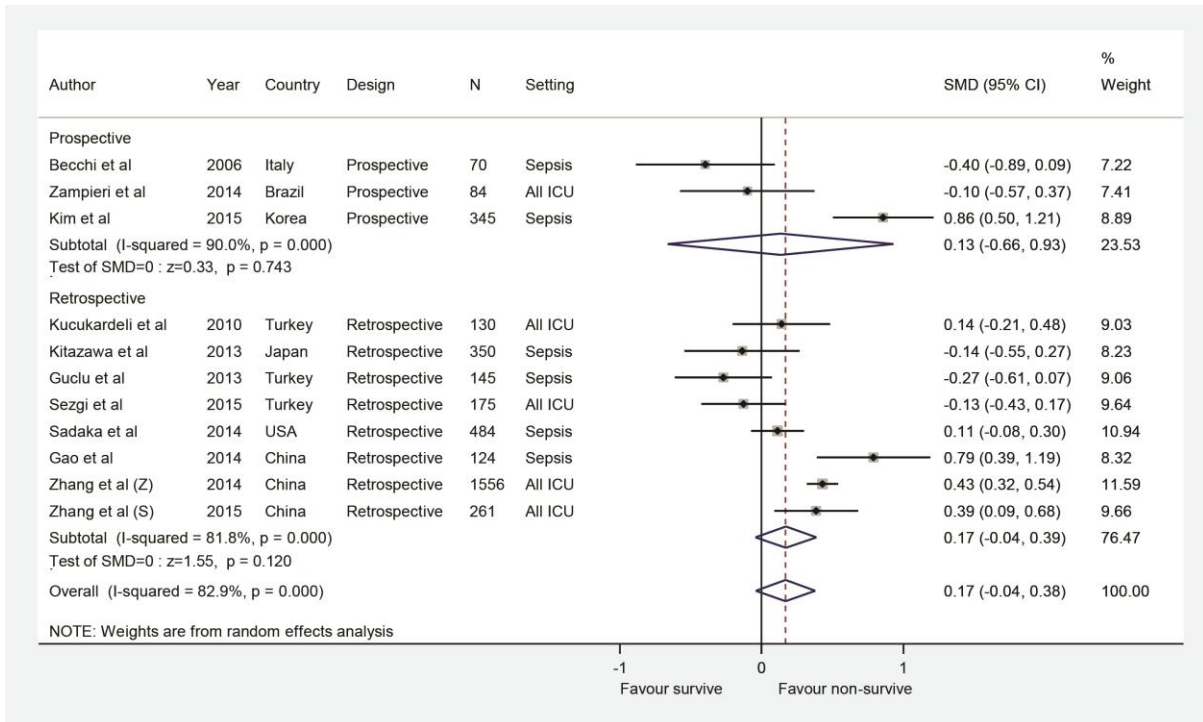

**Supplement figure 2.** The pooled mean differences of the mean platelet volume between critically ill non-survivors and survivors: subgroup analysis by “*type of study design*”.

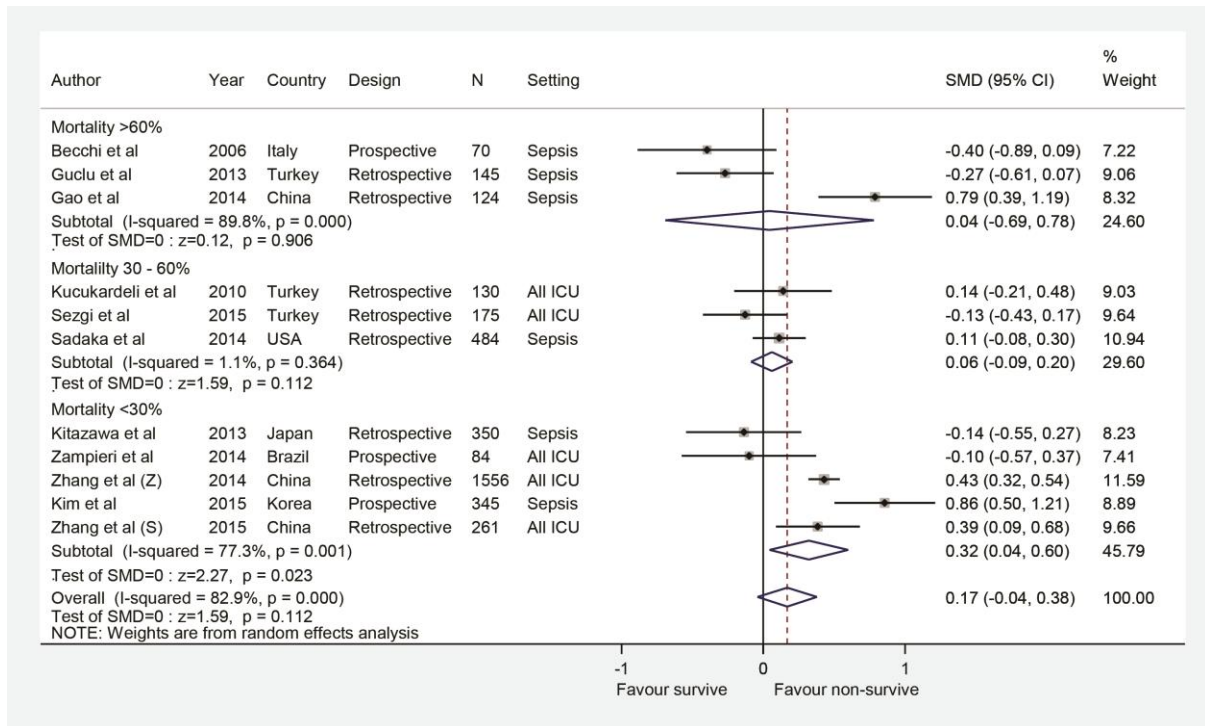

**Supplement figure 3.** The pooled mean differences of the mean platelet volume between critically ill non-survivors and survivors: subgroup analysis by “*mortality rate more than 60 percent, 30 – 60 percent and up to 30 percent*”.

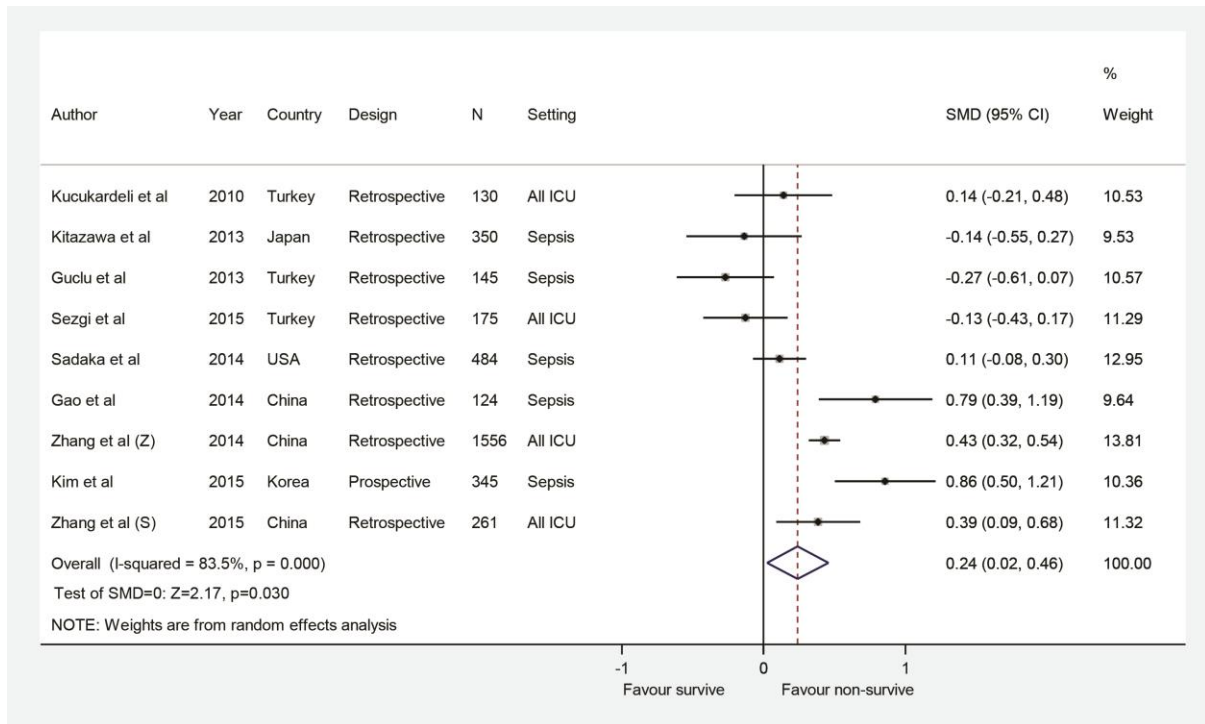

**Supplement figure 4.** The pooled mean differences of the mean platelet volume between critically ill non-survivors and survivors: sensitivity analysis by *exclusion the small studies (total sample less than 100)*.

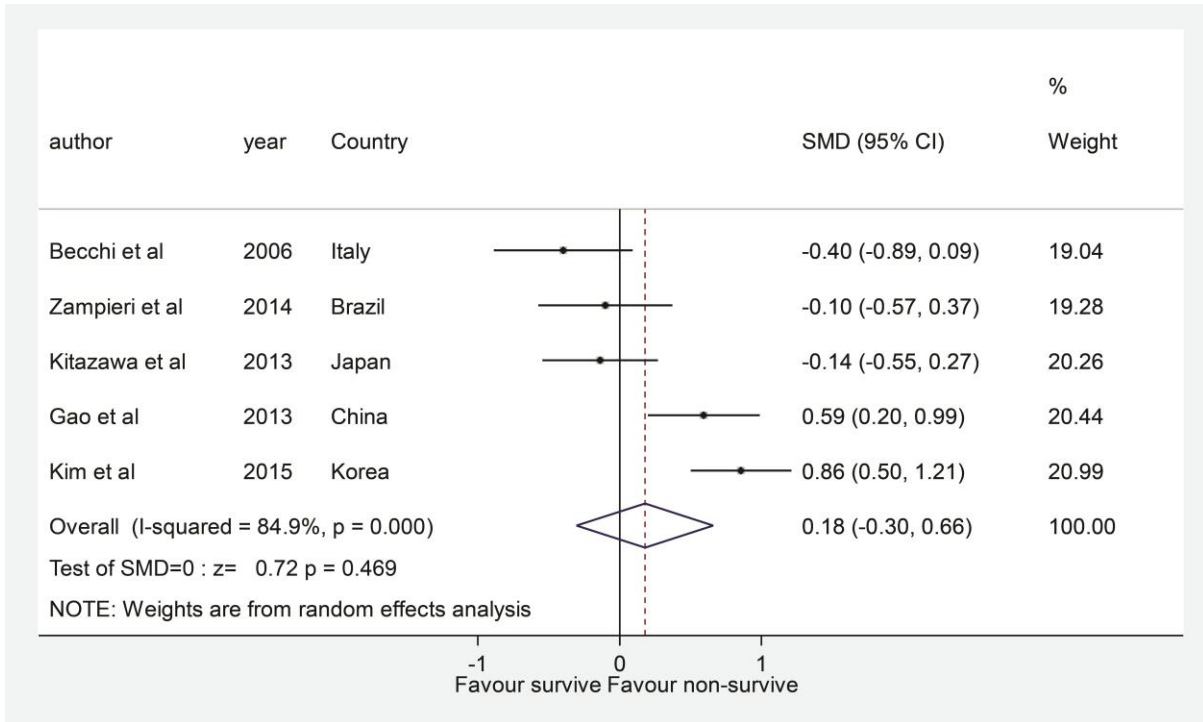

**Supplement figure 5.** The pooled mean differences of the mean platelet volume between critically ill non-survivors and survivors on “*the first day*”.

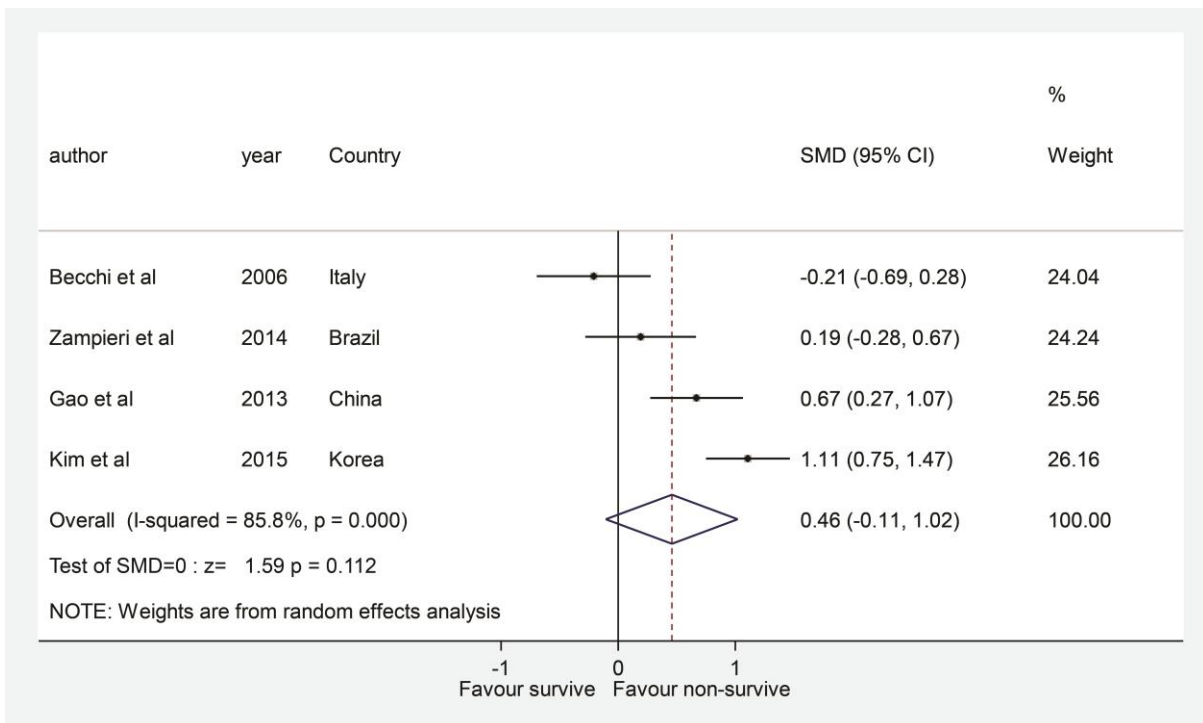

**Supplement figure 6.** The pooled mean differences of the mean platelet volume between critically ill non-survivors and survivors on “*the second day*”.

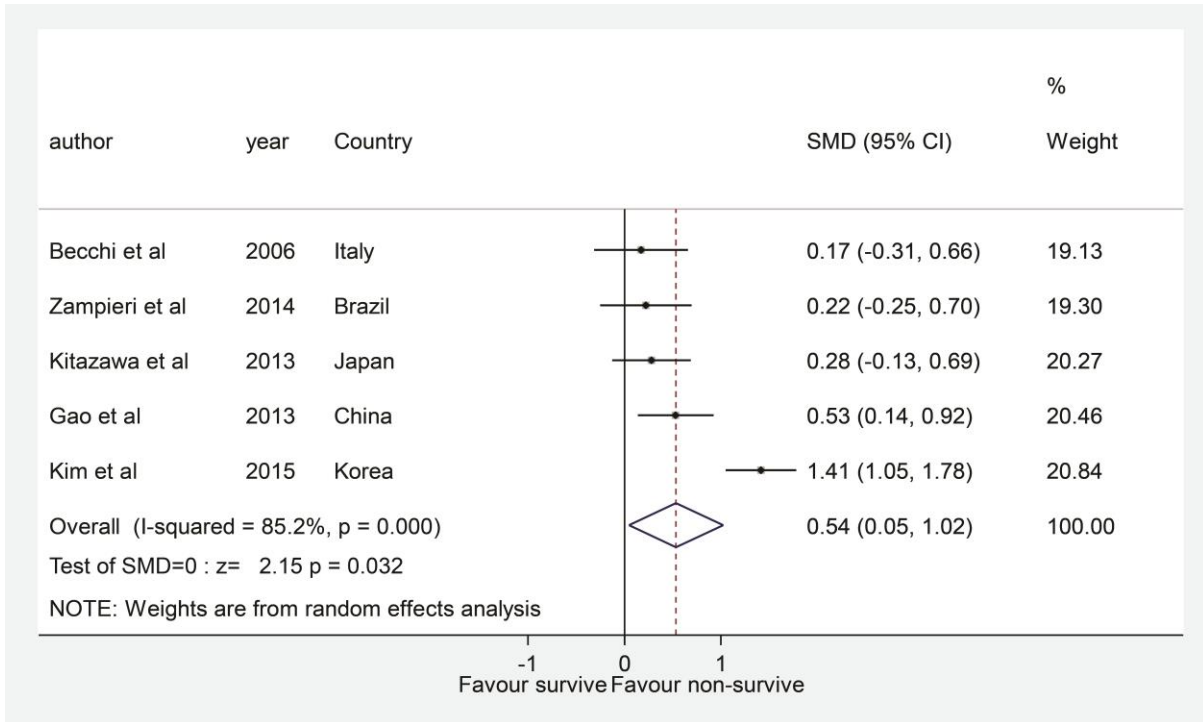

**Supplement figure 7.** The pooled mean differences of the mean platelet volume between critically ill non-survivors and survivors on “*the third day*”.

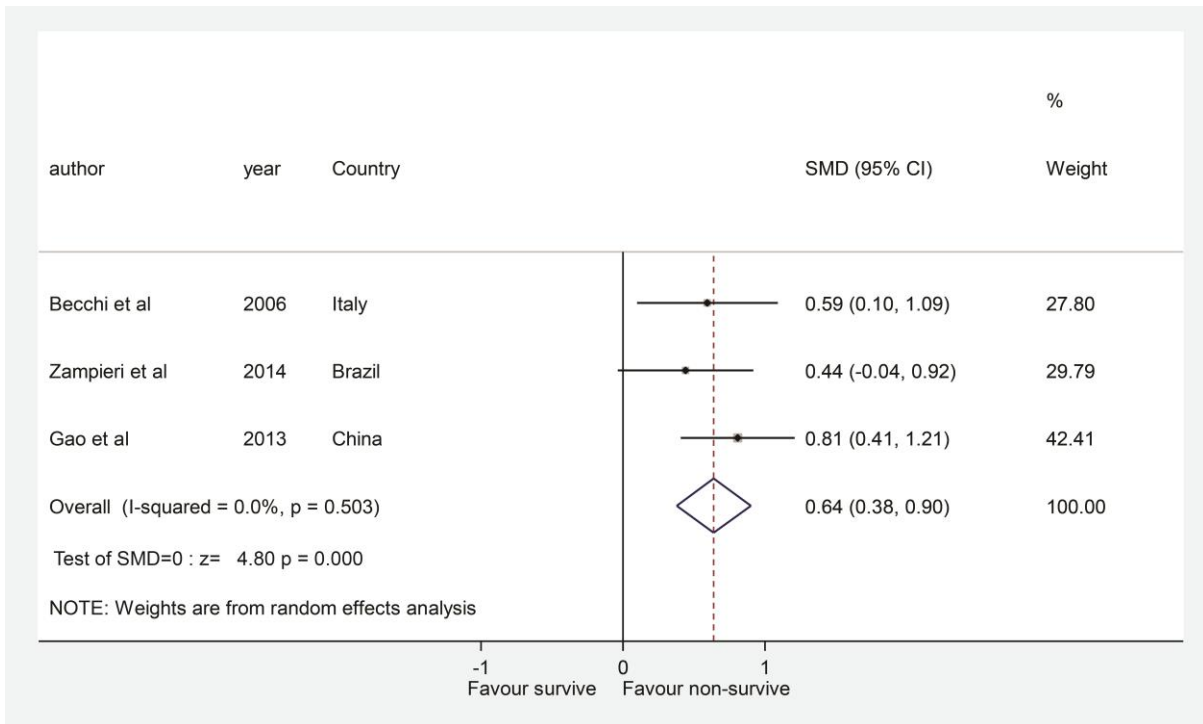

**Supplement figure 8.** The pooled mean differences of the mean platelet volume between critically ill non-survivors and survivors on “*the fourth day*”.

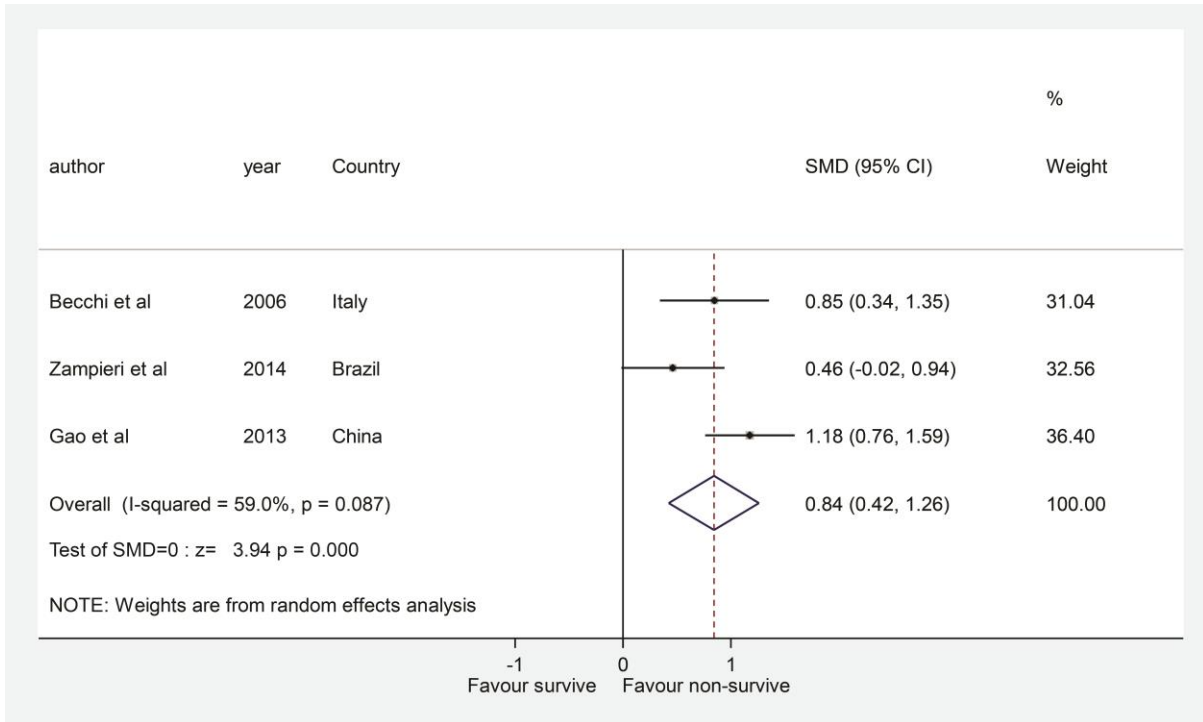

**Supplement figure 9.** The pooled mean differences of the mean platelet volume between critically ill non-survivors and survivors on “*the fifth day*”.

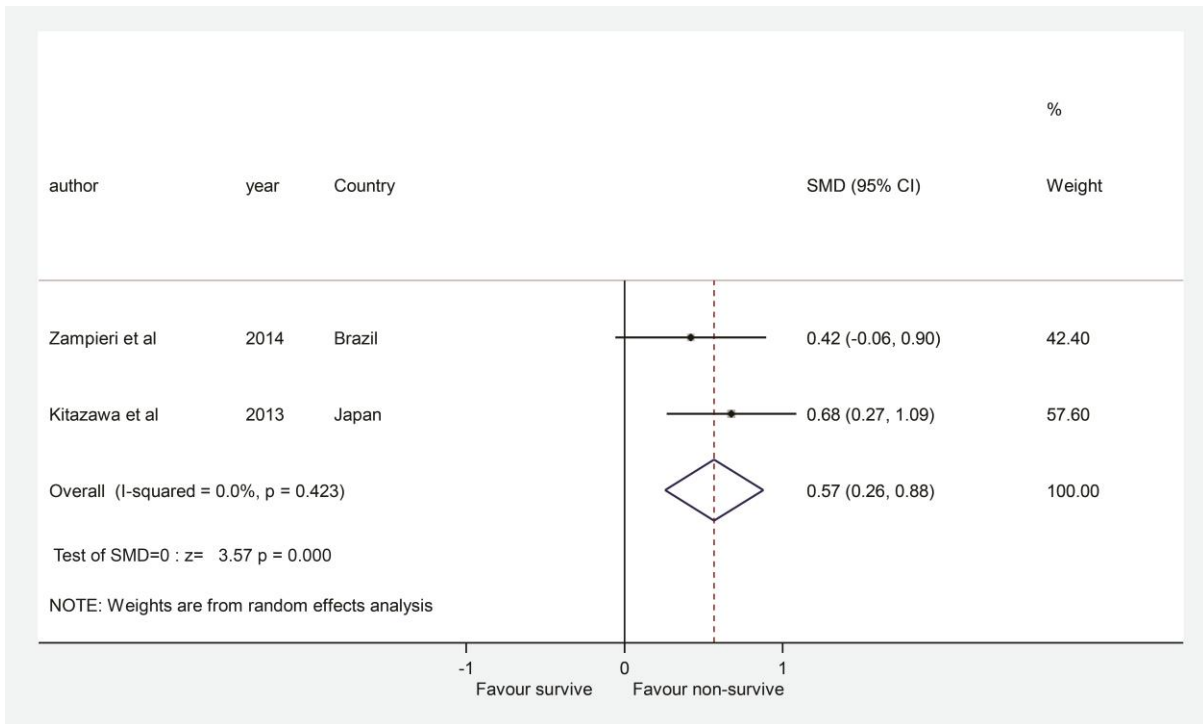

**Supplement figure 10.** The pooled mean differences of the mean platelet volume between critically ill non-survivors and survivors on “*the seventh day*”.

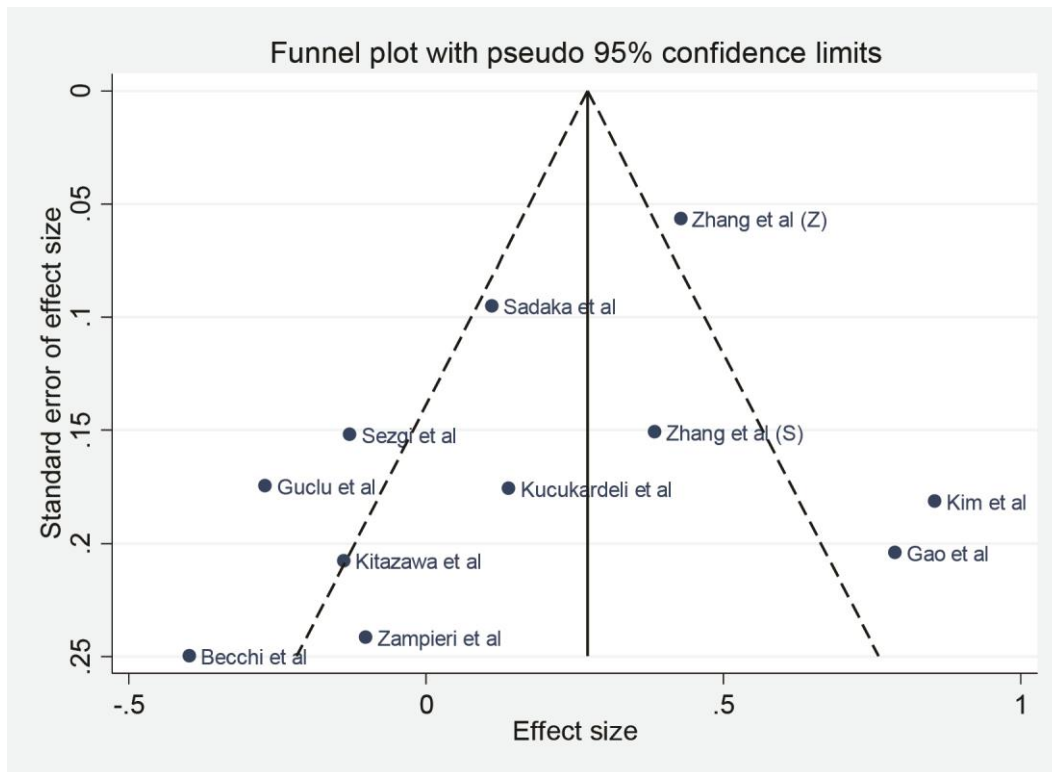

**Supplement figure 11:** The funnel plot of the mean differences in the mean platelet volume between survivors and non-survivors among critically ill patients.

**Supplemental tables 1–3****Supplemental table 1:** Daily MPV in Survivors and Non-survivors among Critically Ill Patients**Supplemental table 2:** Risk of Bias Assessment for Cohort Studies**Supplemental table 3:** meta-regression on the possible sources of heterogeneity based on study characters**Supplemental table 1:** Daily MPV in Survivors and Non-survivors among Critically Ill Patients

| Author                | Year |               | MPV within day 1  | MPV within day 2  | MPV within day 3  | MPV within day 4  | MPV within day 5  | MPV within day 7 |
|-----------------------|------|---------------|-------------------|-------------------|-------------------|-------------------|-------------------|------------------|
| Becchi et al. [18]    | 2006 | Non-survivors | 9.96 ± 1.70       | 10.15 ± 1.70      | 10.47 ± 1.80      | 10.80 ± 1.50      | 11.10 ± 1.60      | -                |
|                       |      | Survivors     | 10.54 ± 0.90      | 10.45 ± 0.80      | 10.20 ± 1.10      | 10.02 ± 0.90      | 9.88 ± 1.10       | -                |
| Kitazawa et al. [20]* | 2013 | Non-survivors | 7.47 ± 1.06       | -                 | 8.13 ± 2.04       | -                 | -                 | 8.35 ± 1.88      |
|                       |      | Survivors     | 7.61 ± 1.01       | -                 | 7.80 ± 1.09       | -                 | -                 | 7.57 ± 1.08      |
| Zampieri et al. [24]  | 2014 | Non-survivors | 10.80 ± 0.85      | 11.09 ± 0.96      | 11.20 ± 0.92      | 11.35 ± 0.97      | 11.31 ± 0.92      | 11.23 ± 0.81     |
|                       |      | Survivors     | 10.90 ± 1.04      | 10.90 ± 1.0       | 10.97 ± 1.08      | 10.89 ± 1.07      | 10.84 ± 1.05      | 10.78 ± 1.16     |
| Gao et al. [22] **    | 2014 | Non-survivors | 11.0 (10.3, 12.1) | 10.9 (10.4, 12.0) | 11.1 (10.5, 12.0) | 11.5 (10.4, 12.6) | 12.1 (10.8, 12.9) | -                |
|                       |      | Survivors     | 10.3 (10.0, 10.9) | 10.4 (10.0, 10.8) | 10.4 (9.9, 11.5)  | 10.2 (9.7, 11.1)  | 10.0 (9.6, 11.1)  | -                |
| Kim et al.[26] ***    | 2015 | Non-survivors | 9.54 ± 1.66       | 9.96 ± 1.76       | 10.35 ± 1.69      | -                 | -                 | -                |
|                       |      | Survivors     | 8.54 ± 1.10       | 8.65 ± 1.10       | 8.80 ± 1.01       | -                 | -                 | -                |

*Note:* The data are shown as mean ± SD and median (IQR).

\*Kitazawa et al reported MPV by the time period 0–1 day, 3–5 days, and 7–10 days, respectively. We assumed the period “0–1” as within day 1, the period “3–5” as within day 3, and the period “7–10” as within day 7.

\*\*The daily MPV data were obtained from “Change of platelet parameters in septic shock patients” published in Chinese critical care medicine, January 2014, Volume 26 (1): 28-32.

\*\*\*Chan et al reported MPV at baseline, 36 hours, and 72 hours; hence, we assumed the MPV value at 36 hours as MPV within day 2.



**Supplemental table 2: Risk of Bias Assessment for Cohort Studies**

| Author                  | Year | Selection                    |                                 | Comparability             |                     |                          | Outcome               |                                | Total score |                              |
|-------------------------|------|------------------------------|---------------------------------|---------------------------|---------------------|--------------------------|-----------------------|--------------------------------|-------------|------------------------------|
|                         |      | Representativeness of cohort | Selection of non-exposed cohort | Ascertainment of exposure | Outcome of interest | Comparability of cohorts | Assessment of outcome | Adequate duration of follow-up |             | Adequate follow-up of cohort |
| Becchi et al. [18]      | 2006 | B (1*)                       | A (1*)                          | A (1*)                    | A (1*)              | 0                        | A (1*)                | A (1*)                         | D           | 6                            |
| Kucukardeli et al. [17] | 2010 | B (1*)                       | A (1*)                          | A (1*)                    | A (1*)              | 0                        | A (1*)                | A (1*)                         | D           | 6                            |
| Guclu et al.[19]        | 2013 | A (1*)                       | B (1*)                          | A (1*)                    | A (1*)              | 0                        | A (1*)                | A (1*)                         | D           | 6                            |
| Kitazawa et al.[20]     | 2013 | B (1*)                       | A (1*)                          | A (1*)                    | A (1*)              | A (1*)                   | A (1*)                | A (1*)                         | A (1*)      | 8                            |
| Sadaka et al.[21]       | 2014 | A (1*)                       | A (1*)                          | A (1*)                    | A (1*)              | 0                        | A (1*)                | A (1*)                         | D           | 6                            |
| Zampieri et al.[24]     | 2014 | B (1*)                       | A (1*)                          | A (1*)                    | A (1*)              | 0                        | A (1*)                | A (1*)                         | A (1*)      | 7                            |
| Sezgi et al.[23]        | 2015 | C (0)                        | A (1*)                          | A (1*)                    | A (1*)              | 0                        | A (1*)                | A (1*)                         | D           | 5                            |
| Zhang et al.(Z)[25]     | 2014 | B (1*)                       | A (1*)                          | A (1*)                    | A (1*)              | 0                        | A (1*)                | A (1*)                         | A (1*)      | 7                            |
| Gao et al.[22]          | 2014 | B (1*)                       | A (1*)                          | A (1*)                    | A (1*)              | 0                        | A (1*)                | A (1*)                         | D           | 6                            |
| Kim et al.[26]          | 2015 | B (1*)                       | A (1*)                          | A (1*)                    | A (1*)              | 0                        | A (1*)                | A (1*)                         | A (1*)      | 7                            |
| Zhang et al. (S ) [27]  | 2015 | B (1*)                       | A (1*)                          | A (1*)                    | A (1*)              | 0                        | A (1*)                | A (1*)                         | D           | 6                            |

\*The Newcastle and Ottawa risk of bias criteria score, A–D are the risk of bias criteria classification of the Newcastle and Ottawa method.

**Supplemental table 3:** meta-regression on the possible sources of heterogeneity based on study characters

| Possible sources of heterogeneity | Number of studies | I square (%) | p value |
|-----------------------------------|-------------------|--------------|---------|
| All                               | 11                | 82.9         | 0.196   |
| Study design*                     | 11                | 84.6         | 0.995   |
| ICU setting**                     | 11                | 83.4         | 0.989   |
| Mortality rate***                 | 11                | 78.7         | 0.353   |
| Age in non-survive                | 10                | 83.7         | 0.940   |
| Age in survive                    | 10                | 82.6         | 0.660   |
| Male in non-survive               | 7                 | 72.0         | 0.087   |
| Male in survive                   | 7                 | 85.4         | 0.644   |
| APACHE II score in non-survive    | 6                 | 85.5         | 0.755   |
| APACHE II score in survive        | 6                 | 85.4         | 0.834   |
| SOFA score in non-survive         | 4                 | 87.6         | 0.546   |
| SOFA score in survive             | 4                 | 87.0         | 0.797   |

\*Prospective study vs. Retrospective study; \*\*Sepsis vs. All ICU patients; \*\*\*Mortality rate <30% vs.30-60% vs.>60%
